# Supplementary material for: Nanoporous metal–organic framework comprising of 1D cobalt oxalate chains and flexible ligands exhibiting both dynamic gas adsorption and antiferromagnetic chain behaviours
Source: Royal Society of Chemistry journal article supplement (doi:10.1039/b927200c), 2010-01-01
Supplement: b927200c.pdf [file b927200c.pdf]

**ELECTRONIC SUPPLEMENTARY DATA**

for

**Nanoporous Metal-Organic Framework Comprising of 1D Cobalt Oxalate Chains and Flexible Ligands Exhibiting Both Dynamic Gas Adsorption and Antiferromagnetic Chain Behaviours**

Hong-Qing Hao, Zhuo-Jia Lin, Sheng Hu, Wen-Ting Liu, Yan-Zhen Zheng and Ming-Liang Tong\*

*Key Laboratory of Bioinorganic and Synthetic Chemistry of Ministry of Education, State Key Laboratory of Optoelectronic Materials and Technologies, School of Chemistry and Chemical Engineering, Sun Yat-Sen University, Guangzhou 510275, P. R. China. E-mail: tongml@mail.sysu.edu.cn (M.-L. Tong)*

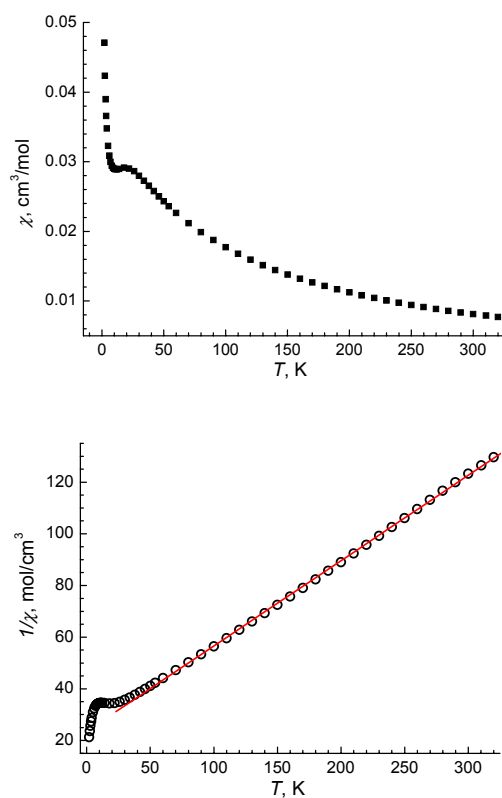

**Figure S1.** Plots of  $\chi$  vs.  $T$  and  $1/\chi$  vs.  $T$  of  $1\cdot 9\text{H}_2\text{O}$ .

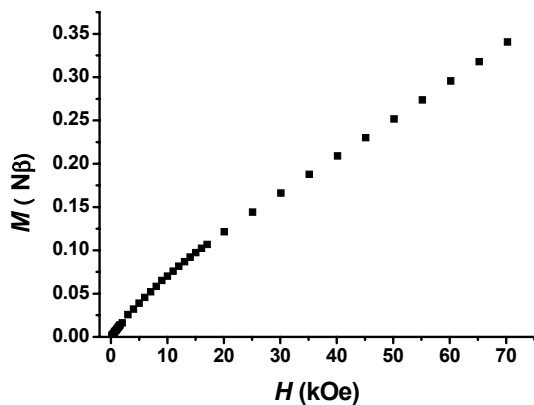

**Figure S2.** Plots of  $M$  vs.  $H$  of  $1 \cdot 9\text{H}_2\text{O}$ .

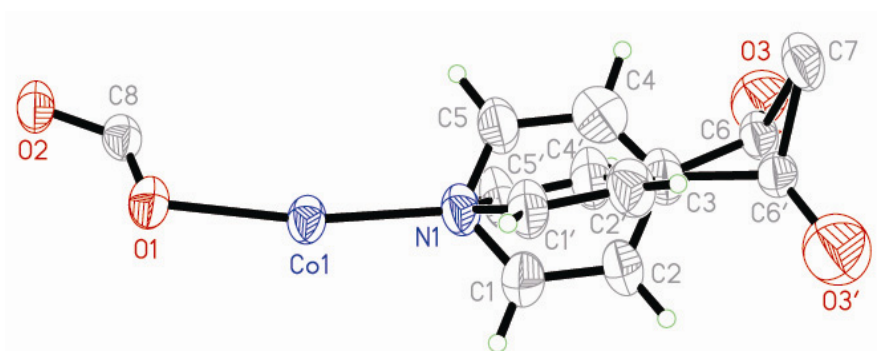

**Figure S3.** ORTEP drawings of the asymmetric unit of **1** with ellipsoids at 50% probability showing the temperature factors of the ligand disordered at two positions.
